# Supplementary material for: Hierarchical assembly of mixed 2D surfactants in polyHIPEs: tuning conductive networks through multi-scale structuring
Source: Royal Society of Chemistry journal article supplement (doi:10.1039/d6ra01377e), 2026-04-28
Supplement: d6ra01377e1.pdf [file d6ra01377e1.pdf]

## Supporting information for:

# Hierarchical Assembly of Mixed 2D Surfactants in PolyHIPEs: Tuning Conductive Networks through Multi-scale Structuring

Deep Shikha Srivastava<sup>†</sup>, Elizabeth E. B. Brown<sup>‡</sup>, Deepthi Varghese<sup>†</sup>, Douglas H. Adamson<sup>†,‡,\*</sup>

<sup>†</sup> Department of Chemistry, University of Connecticut, Storrs, CT 06269, USA

<sup>‡</sup> Polymer Program, Institute of Materials Science, University of Connecticut, Storrs, CT 06269

| Composite             | 1 $\mu\text{m}$ graphite (g) | 10 $\mu\text{m}$ graphite (g) | DI water (mL) | styrene (mL) | DVB (mL) | AIBN (g) |
|-----------------------|------------------------------|-------------------------------|---------------|--------------|----------|----------|
| 100% 1 $\mu\text{m}$  | 0.88                         | 0                             | 140           | 60           | 14       | 0.18     |
| 75% 1 $\mu\text{m}$   | 0.66                         | 0.22                          | 140           | 60           | 14       | 0.18     |
| 50% 1 $\mu\text{m}$   | 0.44                         | 0.44                          | 140           | 60           | 14       | 0.18     |
| 25% 1 $\mu\text{m}$   | 0.22                         | 0.66                          | 140           | 60           | 14       | 0.18     |
| 100% 10 $\mu\text{m}$ | 0                            | 0.88                          | 140           | 60           | 14       | 0.18     |

**Table S1:** Reagent amounts for “pre-mixed” graphite composites. “Pre-mixed” refers to composites in which both the 1 and 10  $\mu\text{m}$  graphites were combined in the same Erlenmeyer flask prior to forming an emulsion.

| Composite             | 1 $\mu\text{m}$ graphite (g) | DI water (mL) | styrene (mL) | DVB (mL) | AIBN (g) |
|-----------------------|------------------------------|---------------|--------------|----------|----------|
| 100% 1 $\mu\text{m}$  | 0.88                         | 140           | 60           | 14       | 0.18     |
| 75% 1 $\mu\text{m}$   | 0.66                         | 105           | 45           | 10.5     | 0.135    |
| 50% 1 $\mu\text{m}$   | 0.44                         | 70            | 30           | 7.0      | 0.09     |
| 25% 1 $\mu\text{m}$   | 0.22                         | 35            | 15           | 3.5      | 0.045    |
| 100% 10 $\mu\text{m}$ | 0.00                         | 0             | 0            | 0.0      | 0.00     |

**Table S2:** Reagent amounts for 1  $\mu\text{m}$  emulsions used in the “post-mixed” graphite composites. “Post-mixed” refers to emulsions of each graphite size (1 and 10  $\mu\text{m}$ ) being made separately, then combined once an emulsion was formed.

| <b>Composite</b>                        | <b>10 <math>\mu\text{m}</math> graphite (g)</b> | <b>DI water (mL)</b> | <b>styrene (mL)</b> | <b>DVB (mL)</b> | <b>AIBN (g)</b> |
|-----------------------------------------|-------------------------------------------------|----------------------|---------------------|-----------------|-----------------|
| <b>100% 1 <math>\mu\text{m}</math></b>  | 0.00                                            | 0                    | 0                   | 0.0             | 0.00            |
| <b>75% 1 <math>\mu\text{m}</math></b>   | 0.22                                            | 35                   | 15                  | 3.5             | 0.045           |
| <b>50% 1 <math>\mu\text{m}</math></b>   | 0.44                                            | 70                   | 30                  | 7.0             | 0.09            |
| <b>25% 1 <math>\mu\text{m}</math></b>   | 0.66                                            | 105                  | 45                  | 10.5            | 0.135           |
| <b>100% 10 <math>\mu\text{m}</math></b> | 0.88                                            | 140                  | 60                  | 14.0            | 0.18            |

**Table S3:** Reagent amounts for 10  $\mu\text{m}$  emulsions used in the “post-mixed” graphite composites. “Post-mixed” refers to emulsions of each graphite size (1 and 10  $\mu\text{m}$ ) being made separately, then combined once an emulsion was formed.

| <b>Composite</b>      | <b>2D surfactant (g)</b> | <b>DI water (mL)</b> | <b>styrene (mL)</b> | <b>DVB (mL)</b> | <b>AIBN (g)</b> |
|-----------------------|--------------------------|----------------------|---------------------|-----------------|-----------------|
| <b>Graphite</b>       | 0.44                     | 70                   | 30                  | 7.0             | 0.09            |
| <b>Boron nitride</b>  | 0.88                     | 70                   | 30                  | 7.0             | 0.09            |
| <b>Pre-mixed BNG</b>  | 0.22 G; 0.22 BN          | 70                   | 30                  | 7.0             | 0.09            |
| <b>Post-mixed: G</b>  | 0.22                     | 35                   | 15                  | 3.5             | 0.045           |
| <b>Post-mixed: BN</b> | 0.44                     | 35                   | 15                  | 3.5             | 0.045           |

**Table S4:** Reagent amounts for graphite and boron nitride emulsions, including pre- and post-mixed samples.

| <b>Composite</b>                        | <b>Pre-mixed average electrical conductivity (S/m)</b> | <b>Post-mixed average electrical conductivity (S/m)</b> |
|-----------------------------------------|--------------------------------------------------------|---------------------------------------------------------|
| <b>100% 1 <math>\mu\text{m}</math></b>  | 0.135 $\pm$ 0.005                                      | 0.135 $\pm$ 0.005                                       |
| <b>75% 1 <math>\mu\text{m}</math></b>   | 0.124 $\pm$ 0.004                                      | 0.129 $\pm$ 0.001                                       |
| <b>50% 1 <math>\mu\text{m}</math></b>   | 0.194 $\pm$ 0.008                                      | 0.140 $\pm$ 0.006                                       |
| <b>25% 1 <math>\mu\text{m}</math></b>   | 0.244 $\pm$ 0.029                                      | 0.170 $\pm$ 0.003                                       |
| <b>100% 10 <math>\mu\text{m}</math></b> | 0.309 $\pm$ 0.013                                      | 0.309 $\pm$ 0.013                                       |

**Table S5:** Electrical conductivity values for 1 and 10  $\mu\text{m}$  graphene composites with varying percentages of each type of graphene, as an accompaniment to Figure 4 in the main manuscript.

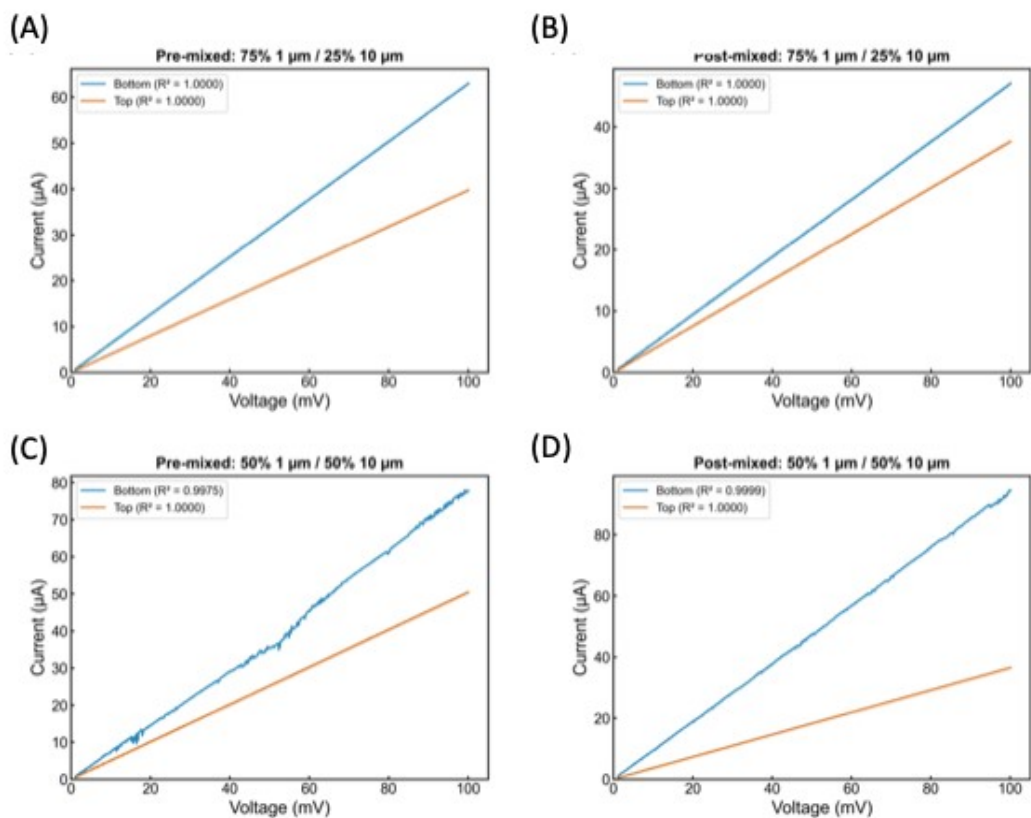

**Figure SI1.** Representative IV curves of samples reported in Figure 4b.

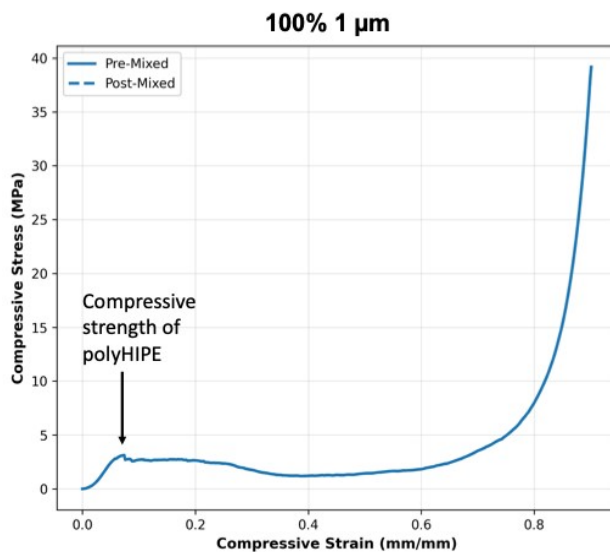

**Figure SI2.** Example stress/strain curve used to determine the compressive strength of the graphene/BN composites.

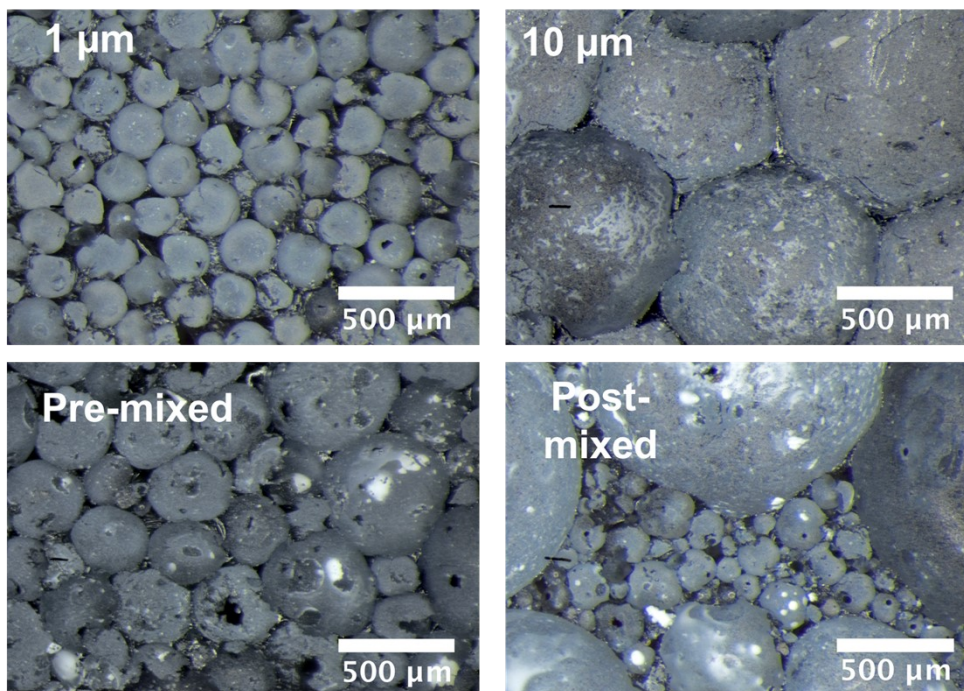

**Figure SI3:** An enlarged view of the photos of 1  $\mu\text{m}$ , 10  $\mu\text{m}$ , pre-mixed, and post-mixed graphite composites shown in Figure 2 of the manuscript, presented for easier viewing.

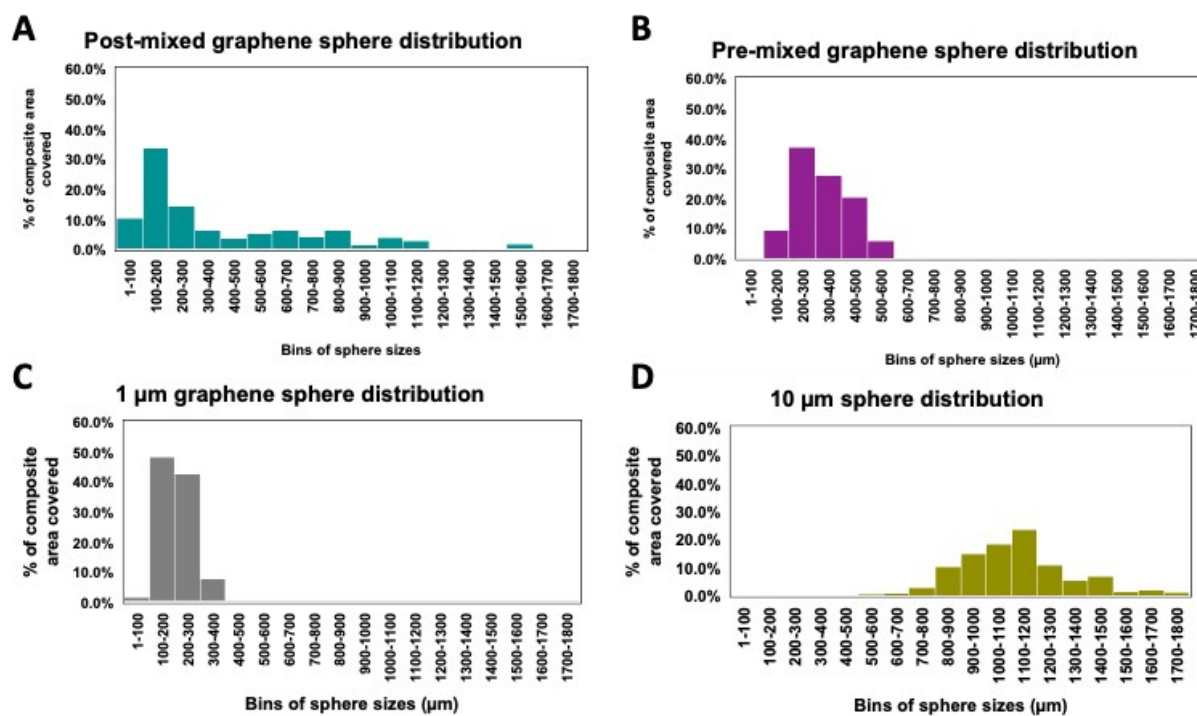

**Figure SI4.** Histograms of sphere size distributions for A) polyHIPE made by mixing emulsions made separately with 1  $\mu\text{m}$  and 10  $\mu\text{m}$  graphite flakes, B) polyHIPE made by mixing 1  $\mu\text{m}$  and 10  $\mu\text{m}$  graphite flake prior to forming an emulsion, C) polyHIPE formed from 1  $\mu\text{m}$  graphite flake, and D) polyHIPE made with 10  $\mu\text{m}$  graphite flakes. The vertical axis is the % area of the images constituting each bin of sphere sizes.

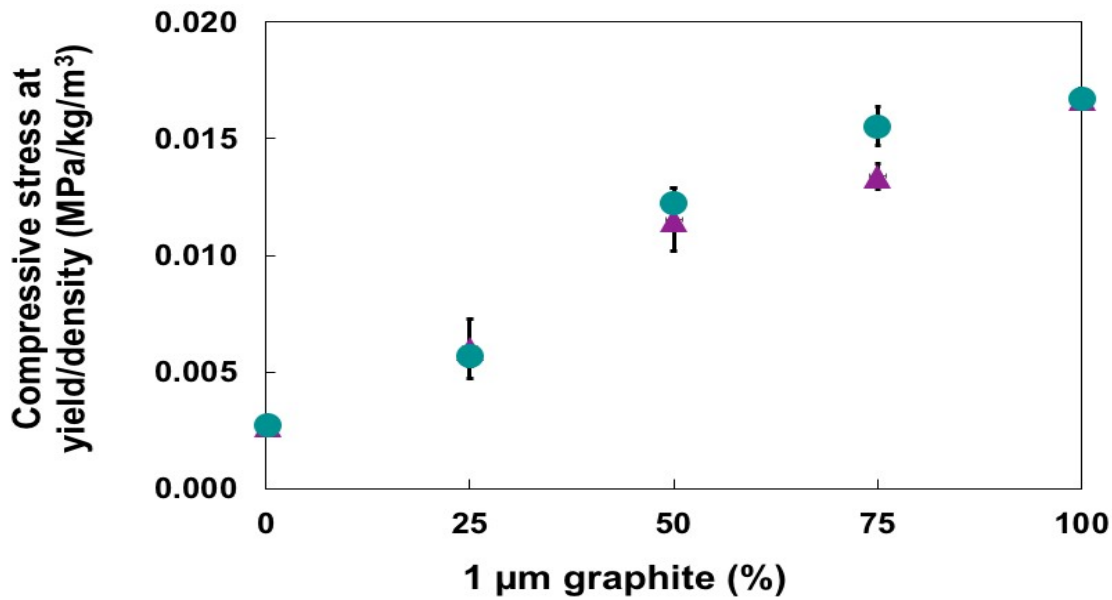

**Figure SI5.** Graph depicting the change in specific compressive stress (as normalized by composite density) of composites made with varying fractions of 1  $\mu\text{m}$  graphite. The pre-mixed samples are represented by purple triangles, and the post-mixed materials correspond to the teal circles.

| Composite (% 1 $\mu\text{m}$ graphite) | Post-mixed density ( $\text{g}/\text{cm}^3$ ) | Pre-mixed density ( $\text{g}/\text{cm}^3$ ) | Porosity range (%) |
|----------------------------------------|-----------------------------------------------|----------------------------------------------|--------------------|
| 100                                    | 0.196                                         | 0.196                                        | 81                 |
| 75                                     | 0.176                                         | 0.161                                        | 83–85              |
| 50                                     | 0.140                                         | 0.150                                        | 86–87              |
| 25                                     | 0.089                                         | 0.103                                        | 90–92              |
| 0 (100% 10 $\mu$ Graphite)             | 0.077                                         | 0.077                                        | 93                 |

**Table S6:** Density and porosity of samples whose compressive strength and conductivity are plotted in Figure 4.

Density was calculated by dividing the sample mass by its volume, measured with calipers. Porosity was found using the standard foam porosity formula:

$$\text{Porosity} = 1 - \left( \frac{\rho_{foam}}{\rho_{solid}} \right)$$

Where:

- $\rho_{foam}$  = measured density of the composite foam (from the data, e.g.  $0.196 \text{ g}/\text{cm}^3$ )
- $\rho_{solid}$  = density of the fully dense matrix material

It was assumed that  $\rho_{solid} \approx 1.05 \text{ g}/\text{cm}^3$  for crosslinked polystyrene-divinylbenzene, which is a standard literature value for PS-DVB.

For example, for the 100% 1  $\mu\text{m}$  composite (bottom):

$$\text{Porosity} = 1 - \left( \frac{0.196}{1.05} \right) = 1 - 0.187 = 0.813 \rightarrow \sim\mathbf{81\%}$$
